# Supplementary material
Source: HighWire-hosted journal article supplement (https://stm.sciencemag.org/content/suppl/2012/06/29/4.141.141cm7)
Supplement: 3003589s.pdf [file 3003589s.pdf]

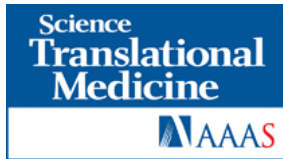

[www.sciencetranslationalmedicine.org/cgi/content/full/4/141/141cm7/DC1](http://www.sciencetranslationalmedicine.org/cgi/content/full/4/141/141cm7/DC1)

Supplementary Materials for  
**From Free to Free Market: Cost Recovery in Federally Funded Clinical  
Research**

Corresponding author. E-mail: [bower@med.umich.edu](mailto:bower@med.umich.edu)

Published 4 July 2012, *Sci. Transl. Med.* 4, 141cm7 (2012)  
DOI: 10.1126/scitranslmed.3003589

**The PDF file includes:**

Methods  
Fig. S1  
Tables S1 to S3

## **SUPPLEMENTARY INFORMATION**

### **METHODS**

The interview script in table S1 was used to lead the discussions on cost recovery with  $n = 19$  CTSA's across the country. The initial interviews were largely unstructured, other than the Primary Questions shown in Table 1, to afford each interviewee the opportunity to identify and expand upon issues which were, in their experience, of the highest importance. This prevented any 'leading' by the interviewer and enabled the interview process to evolve as the CTSA's self-reported on the issues which were the highest priority for them. As the interviews progressed, we identified issues that were commonly self-reported across multiple institutions. The initial responses were then analyzed and used to develop more detailed questions in the relevant areas which were addressed in follow-up interviews.

From their responses, we identified trends in approaches to this new field with regards to policies, models and objectives of the program. This information refined our enquiries and ultimately enabled us to identify components common to those CRMs which were described by the institution as successful. We then went on to define initiatives that worked or which were tried and then either discarded or in the process of being significantly altered. As a result of this iterative process, we also shared experiences which were highlighted by the institutions as important with regards to CRM implementation.

SUPPLEMENTARY FIGURE

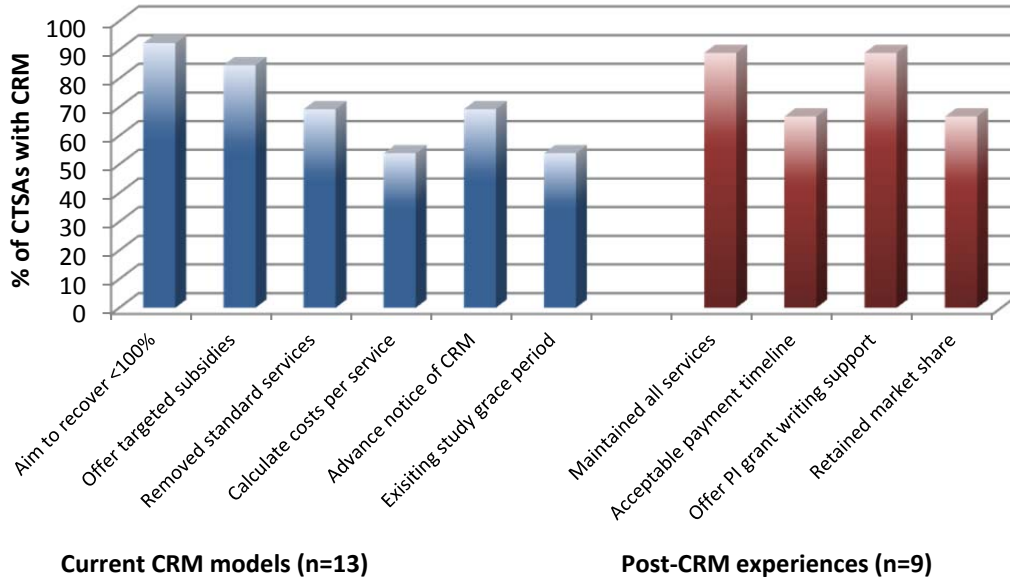

**Figure S1. Overview of the current CTSA cost recovery landscape and the associated impact.** Of the 19 organizations surveyed herein, 13 operate a CRM, 3 are in the early stages of developing a CRM, and the remaining 3 have no model in place with no plans to introduce one at this stage. The key features most frequently incorporated into individual CRMs are illustrated in blue and the most common impact areas following implementation are in red.

## SUPPLEMENTARY TABLES

Table S1 shows the questions that were developed for the interview guidance notes during the course of this work.

### Table S1. CTSA cost recovery interview guide.

The primary questions were used in the first round of interviews, during which trends were initially identified. These trends were then clarified and confirmed through iterative interviews using the follow-up questions.

| Question number | Primary questions                                                                                                                                                                                                                                                                                 | Follow-up questions                                                                                                                                                                                                                                                                         |
|-----------------|---------------------------------------------------------------------------------------------------------------------------------------------------------------------------------------------------------------------------------------------------------------------------------------------------|---------------------------------------------------------------------------------------------------------------------------------------------------------------------------------------------------------------------------------------------------------------------------------------------|
| 1               | <b>Do you have a cost recovery model for federally funded research?</b>                                                                                                                                                                                                                           | Are you considering a cost recovery model for the future?                                                                                                                                                                                                                                   |
| 2               | <b>If you have a current cost recovery model, do you:</b><br>a) Offer a scale for charges<br>b) Offer additional subsidies or exemptions.<br><br>c) Aim for 100% recovery?<br>• If you aim for <100% - by how much?<br><br>d) Do you operate a bundled charging mechanism or individual charging? | b) If you offer additional subsidies or exemptions, are any of these specifically targeted to:<br>• Young investigators?<br>• Pilot studies?<br>• Other PIs / research areas etc?<br><br>c) On introduction of your cost recovery mechanism, did you maintain any free 'standard' services? |
| 3               | <b>On introduction of your CRM did you grandfather existing studies:</b><br>a) Permanently?<br>b) For a set grace period? (if so, for how long?)<br>c) Did not Grandfather                                                                                                                        |                                                                                                                                                                                                                                                                                             |
| 4               | <b>Did you give notice that a CRM was being introduced?</b><br>a) To existing PIs?<br>b) If so, of how many months?                                                                                                                                                                               | a) To potential new PIs?<br>b) If so, of how many months?                                                                                                                                                                                                                                   |
| 5               | <b>Following the introduction of a CRM did you:</b><br>a) See a fall in your level of new studies?<br><br>b) Cut some services?<br>c) Experience a lag time on payments?                                                                                                                          | a) If so, was the fall evenly distributed e.g. between young vs. senior PIs?<br>b) If so, which ones and what were your criteria?<br>c) How long was the payment lag time?<br>d) Did you introduce a service to help PIs write the new CSC costs in their grants?                           |
| 6               | <b>Are you 100% happy with your current model?</b>                                                                                                                                                                                                                                                | Are there any features you looking to change?                                                                                                                                                                                                                                               |

**Table S2. Current CTSA approaches to the main cost recovery focus areas.**

| <b>Focus area</b>               | <b>Current CTSA approaches</b>                                                                                                                                                                                                                                                                                                                                              | <b>Example</b>                                                                                                                                                                                                                                                                                                                                                                                                                                                                                                                                                                                                                       |
|---------------------------------|-----------------------------------------------------------------------------------------------------------------------------------------------------------------------------------------------------------------------------------------------------------------------------------------------------------------------------------------------------------------------------|--------------------------------------------------------------------------------------------------------------------------------------------------------------------------------------------------------------------------------------------------------------------------------------------------------------------------------------------------------------------------------------------------------------------------------------------------------------------------------------------------------------------------------------------------------------------------------------------------------------------------------------|
| <b>Level of recovery</b>        | <p>Charge a % recovery for all services offered.</p> <p>Charge a variable % for different services.</p> <p>Charge for just a set class of services.</p> <p>Charge only for Primary Outcome Variable.</p> <p>Costs reflect infrastructure differences.</p> <p>Target charges at high users / senior PIs.</p> <p>Significantly raise rates for services currently charged</p> | <p>Recover a % charge for every service carried out within the CRU</p> <p>Recover a % charge for nursing services, another % charge for labs etc.</p> <p>Recover up to 100%, just for services considered too expensive to offer for free.</p> <p>Cost recover the most significant service for each study i.e. charged services vary by study.</p> <p>Variables such as rent result in different costs for the same service at different sites.</p> <p>Offer a set number of inpatient beds for free per year, anything more carries a charge.</p> <p>Charge high rates for lab work to avoid introducing charges to new areas.</p> |
| <b>Cost recovery initiation</b> | <p>Determine date of cost recovery implementation.</p>                                                                                                                                                                                                                                                                                                                      | <p>Implement CRM immediately, offer grace period, or stage implementation.</p>                                                                                                                                                                                                                                                                                                                                                                                                                                                                                                                                                       |
| <b>Managing the CRM</b>         | <p>Price all services individually.</p> <p>Operate a mix of bundled and individual prices.</p> <p>Bundle services into an all-inclusive charging model.</p>                                                                                                                                                                                                                 | <p>Shopping cart style –one hourly rate for nursing, another hourly rate for rooms etc.</p> <p>Bundle common combinations of service but maintain individual price options.</p> <p>By service, by time or a mix of each.</p>                                                                                                                                                                                                                                                                                                                                                                                                         |

**Table S3. Current CTSA policies for cost recovery subsidies.**

| <b>Policy area</b>                 | <b>Current CTSA approaches</b>                                                                                                                                                                                                                                   | <b>Example</b>                                                                                                                                                                                                                                                                                                                                                                                                                                                                                                                                                                                                                |
|------------------------------------|------------------------------------------------------------------------------------------------------------------------------------------------------------------------------------------------------------------------------------------------------------------|-------------------------------------------------------------------------------------------------------------------------------------------------------------------------------------------------------------------------------------------------------------------------------------------------------------------------------------------------------------------------------------------------------------------------------------------------------------------------------------------------------------------------------------------------------------------------------------------------------------------------------|
| <b>Existing studies</b>            | <p>Charge as for a new study.</p> <p>Grandfather for a set time.</p> <p>Variable Grandfathering subsidies.</p> <p>Grandfather indefinitely.</p> <p>Charge only for study changes.</p> <p>Offer competitive subsidy funding.</p>                                  | <p>Full study costs applied from the date of cost recovery implementation.</p> <p>Offer a blanket grace period to all studies or initiate a ‘Grandfather subsidy’ by % or time limit.</p> <p>Grandfathering policy is decided on a case-by-case basis by the Subsidies Committee.</p> <p>This can be defined as until the end of the funding period or the end of the study.</p> <p>Limit cost recovery to protocol changes which require additional CSC resources.</p> <p>For studies which demonstrably cannot re-budget and have tried to win external funding.</p>                                                        |
| <b>Subsidies by study features</b> | <p>Subsidize pilot studies.</p> <p>Subsidize specific types of study.</p> <p>Subsidize certain research fields.</p> <p>Benchmark study costs/subsidies.</p> <p>Variable subsidies</p> <p>Offer no subsidies by study type.</p> <p>Match external PI funding.</p> | <p>CSC services free of cost for pilot funded studies and/ or for pilot ideas even without pilot funding.</p> <p>Such as very short, simple or inexpensive study types or those which utilize only limited services.</p> <p>Such as priority or emerging fields within the institution, internally funded research etc.</p> <p>Subsidize studies based on an agreed proportion of industry/ Medicare rates,</p> <p>Subsidy award decided on a case-by-case basis by the Subsidies Committee.</p> <p>All studies pay the same rates, regardless of structure or funding source.</p> <p>With or without a cap at a \$ or %.</p> |
| <b>Subsidies by PI type</b>        | <p>Target subsidies to new PIs.</p> <p>Offer the same subsidy to all PIs.</p> <p>Offer competitive subsidies.</p> <p>Offer no subsidies by PI group.</p>                                                                                                         | <p>Assistant professor level or those PIs who are new to clinical research.</p> <p>Offer subsidized introductory work to PIs, who then ‘graduate’ to fee paying.</p> <p>Award subsidies as competitive ‘grants’ or by special application i.e. case-by-case basis.</p> <p>All PIs pay the same costs, regardless of status.</p>                                                                                                                                                                                                                                                                                               |
